# Supplementary material
Source: PubMed Central journal article supplement (PMC3403101)
Supplement: supp_139.16.2891_DEV083162TableS1.pdf [file supp_139.16.2891_DEV083162TableS1.pdf]

**Table S1. Phenotypes of *dPatj* deletion alleles**

| Allele/genotype                                                 | Phenotype            |
|-----------------------------------------------------------------|----------------------|
| <i>dPatj<sup>Δ7</sup>/Df(3L)BSC123</i>                          | Pupal lethal         |
| <i>dPatj<sup>Δ13</sup>/Df(3L)BSC123</i>                         | Pupal lethal         |
| <i>dPatj<sup>Δ14</sup>/Df(3L)BSC123</i>                         | Pupal lethal         |
| <i>dPatj<sup>Δ7</sup>/dPatj<sup>Δ7</sup></i>                    | Embryonic lethal     |
| <i>dPatj<sup>Δ7</sup>/dPatj<sup>Δ13</sup></i>                   | Pupal lethal         |
| <i>dPatj<sup>Δ7</sup>/dPatj<sup>Δ14</sup></i>                   | First instar lethal  |
| <i>dPatj<sup>Δ13</sup>/dPatj<sup>Δ13</sup></i>                  | Second instar lethal |
| <i>dPatj<sup>Δ13</sup>/dPatj<sup>Δ14</sup></i>                  | Pupal lethal         |
| <i>dPatj<sup>Δ14</sup>/dPatj<sup>Δ14</sup></i>                  | Embryonic lethal     |
| <i>dPatj<sup>Δ7</sup> VK20-dPatj-L/dPatj<sup>Δ7</sup></i>       | Viable               |
| <i>dPatj<sup>Δ7</sup> VK20-dPatj-L/dPatj<sup>Δ13</sup></i>      | Viable               |
| <i>dPatj<sup>Δ7</sup> VK20-dPatj-L/Df(3L)BS123</i>              | Viable               |
| <i>dPatj<sup>Δ7</sup> VK20-dPatj::GFP-S/dPatj<sup>Δ7</sup></i>  | Viable               |
| <i>dPatj<sup>Δ7</sup> VK20-dPatj::GFP-S/dPatj<sup>Δ13</sup></i> | Viable               |
| <i>dPatj<sup>Δ7</sup> VK20-dPatj::GFP-S/Df(3L)BS123</i>         | Viable               |
| <i>dPatj<sup>Δ7GLC</sup>/dPatj<sup>Δ7</sup></i>                 | Embryonic lethal     |
| <i>dPatj<sup>Δ7GLC</sup>/dPatj<sup>Δ13</sup></i>                | Pupal lethal         |
| <i>dPatj<sup>Δ7GLC</sup>/Df(3L)BSC123</i>                       | Pupal lethal         |
| <i>dPatj<sup>Δ7GLC</sup>/dPatj<sup>Δ7</sup> VK20-dPatj-L</i>    | Viable               |
| <i>Df(3L)BSC123 crb<sup>ko</sup>/dPatj<sup>Δ7</sup>*</i>        | Pupal lethal         |
| <i>dPatj<sup>Δ7</sup> crb<sup>ko</sup>/dPatj<sup>Δ13</sup>*</i> | Pupal lethal         |

\**crb<sup>ko</sup>* is a null allele of *crb* generated by gene targeting (Huang et al., 2009).
